1 **A comparison of approaches to scaffolding multiple regions along the 16S rRNA gene**  
2 **for improved resolution**

3 Justine W Debelius<sup>1,2\*</sup> Michael Robeson,<sup>3</sup> Luisa W. Hugerth,<sup>1,2</sup> Fredrik Boulund,<sup>1,2</sup> Weimin  
4 Ye,<sup>4</sup> and Lars Engstrand<sup>1,2</sup>

5

6 1 Centre for Translational Microbiome Research. Department of Microbiology, Tumor, and  
7 Cell Biology. Karolinska Institutet, Solna, Sweden

8 2 Science for Life Laboratory, Solna, Sweden

9 3 Department of BioMedical Informatics. University of Arkansas for Medical Sciences. Little  
10 Rock, AR, USA

11 4 Department of Medical Epidemiology and Biostatistics. Karolinska Institutet, Solna,  
12 Sweden

13

14 \*Corresponding author: [justine.debelius@ki.se](mailto:justine.debelius@ki.se)

15

16

17 **Abstract**

18 *Motivation.* Full length, high resolution 16s rRNA marker gene sequencing has been  
19 challenging historically. Short amplicons provide high accuracy reads with widely available  
20 equipment, at the cost of taxonomic resolution. One recent proposal has been to reconstruct  
21 multiple amplicons along the full-length marker gene, however no barcode-free  
22 computationally tractable approach for this is available. To address this gap, we present Sidle  
23 (SMURF Implementation Done to acceLerate Efficiency), an implementation of the Short  
24 MUltiple Reads Framework algorithm with a novel tree building approach to reconstruct  
25 rRNA genes from individually amplified regions.

26 *Results.* Using simulated and real data, we compared Sidle to two other approaches of  
27 leveraging multiple gene region data. We found that Sidle had the least bias in non-  
28 phylogenetic alpha diversity, feature-based measures of beta diversity, and the reconstruction  
29 of individual clades. With a curated database, Sidle also provided the most precise species-  
30 level resolution.

31 *Availability and Implementation.* Sidle is available under a BSD 3 license from  
32 <https://github.com/jwdebelius/q2-sidle>

33

34 Ribosomal RNA marker gene sequencing has been a mainstay of microbiome analysis for  
35 more than a decade. While there is a movement toward untargeted metagenomic sequencing,  
36 marker gene amplification remains relevant in environments with high host contamination,  
37 such as vaginal communities or biopsy samples [1]. However, marker gene sequencing  
38 comes with several challenges in taxonomic resolution. The use of short amplicons as  
39 opposed to the full 16S rRNA gene has been historically necessary as long read technologies  
40 historically had higher error rates and costs than short reads techniques [2–4]. In some cases,  
41 these errors exceeded real biological differences between 16S rRNA gene. All amplicon  
42 sequencing relies on primers with broad specificity; the primers used to amplify full length  
43 16S genes may not fully capture community diversity [5,6]. However, shorter read  
44 technologies also potentially come with drawbacks. Shorter reads from more universal primer  
45 pairs may have lower taxonomic resolution than full length sequences and therefore miss  
46 important genus- or species-level differences in organisms [7]. Alternatively, organism-  
47 specific primers can come at the cost of accurately describing the rest of the community [8,9].

48

49 Synthetic long read technology, such as the approach marketed by Loop Genomics, provides  
50 the read quality of short read technology with the resolution of long read approaches. Here,  
51 short fragments along the full-length marker gene are tagged with a unique molecular  
52 identifier before PCR. This approach leverages the lower error rates of short read sequencers  
53 coupled with a mostly database-free approach to assembly [10]. However, the technique still  
54 uses primers for the full-length sequence, which may not be able to amplify all taxa with  
55 equal fidelity. The technique requires full length, unfragmented 16S molecules to work  
56 properly, a potential problem for sample types where the DNA may have degraded during  
57 storage, like FPVE biopsies embedded biopsies, or sample types which require heavy bead

58 beating, although the specific technique has not been fully benchmarked under these  
59 conditions [11,12]  
60  
61 Full length sequences can also be reassemble by amplifying multiple regions along a full  
62 length marker gene and then scaffolding using a database approach [6]. This technique may  
63 be more robust to random breakage in the DNA. The mix of primers may allow for less  
64 overall primer bias. The problem then becomes how to combine the regions. One proposed  
65 solution is the use of operational taxonomic units (OTU), clustered against a reference  
66 database [13]. A second, user-proposed pipeline relies on regional denoising to generate  
67 amplicon sequence variants (ASVs). Taxonomic assignments are made using a naïve  
68 Bayesian classifier, and ASVs are scaffolded together using fragment insertion into a  
69 reference tree and then profiled using phylogeny-aware metrics. The third potential solution  
70 to the problem is the use of the Short Multiple Reads Framework (SMURF) algorithm, which  
71 performs regional kmer-based alignment to a reference and then solves the relative  
72 abundance using a maximum likelihood estimator model [6]. This allows the use of disjoint  
73 regions along a molecular target, and theoretically could be extended to combine multiple  
74 marker genes, independent of genome location. The original paper does not consider  
75 phylogeny, potentially limiting insights into the microbial community [14]. Additionally, the  
76 original implementation was challenging to use and required proprietary software. As a  
77 consequence, while the paper has been well cited, the method has not been widely adopted.  
78  
79 To address the issue of combining information from multiple primer regions, we re-  
80 implemented the SMURF algorithm and developed a tree building approach, which is  
81 released as the q2-sidle (SMURF Implementation Done to acceLerate Efficiency) plugin.  
82 Three proposed approaches (closed reference OTUs, ASVs with an insertion tree, and Sidle)

83 were benchmarked to identify the best method for reconstruction, reliably capturing as much  
84 sequence information available across multiple gene regions. We further benchmarked the  
85 ability of each of these approaches on previously published vaginal microbiome data to  
86 determine their ability to recover species-level resolution.

87

## 88 **Materials and Methods**

### 89 *Implementation*

90

91 To facilitate reassembly from multiple marker gene regions, we re-implemented the core  
92 SMURF algorithm in python as Sidle. The code has 95% test coverage with unit testing.  
93 Sidle has been released as a QIIME 2 plugin. This builds on the architecture of the popular  
94 microbiome analysis platform, including the decentralized provenance tracking; multiple  
95 installation options for Linux, OSX, and virtual boxes for windows operating system; and  
96 multiple APIs [15]. Integration with QIIME 2 also creates flexibility: users can enter with  
97 fully multiplexed sequences, partially demultiplexed sequences or even a feature table and  
98 can select denoising and quality filtering algorithms more appropriate to their data rather than  
99 assuming a single quality-filtering error model. To improve performance, Sidle leverages the  
100 python Dask distributed computational library for certain pleasantly parallelizable steps in the  
101 reconstruction algorithm. Dask allows end users to customize their parallel processing to their  
102 local compute architecture, and scales from a single machine to HPC clusters [16].

103

104 The Sidle implementation involves five steps: database preparation, regional sample  
105 preparation and alignment, table reconstruction, taxonomic annotation, and optionally,  
106 building a phylogenetic tree (Figure 1; Supplemental Methods).

107

108 *Data Sources*

109

110 Benchmarking data. To benchmark all techniques, we used tutorial dataset provided by the  
111 original SMURF paper [6] (Supplemental Methods). This consisted of a single sample  
112 without metadata. The sample was compared against the Greengenes 13\_5 (SMURF) and  
113 Greengenes 13\_8 (Sidle) [17].

114

115 Simulation. We generated a set of reference samples based on previously published  
116 experimental data. This provided a base truth community with characteristics similar to true  
117 microbiome data and a biologically relevant, if somewhat large, effect size. Amplicons were  
118 simulated using *in silico* PCR for three primer pairs (Table S1; Supplemental Methods).  
119 Simulations were compared against the Silva 128 database at 99% identity [18].

120

121 Real Data We used a set of 24 vaginal samples (8 individuals with 3 replicates) which have  
122 been previously described [19] (Table S1; Supplemental Methods). The vaginal samples were  
123 compared to the Optivag 16S rRNA database (v0.1) [19]. This curated, vagina-specific  
124 database provides accurate species level assignments.

125

126 *Reconstruction Methods*

127

128 All reconstruction methods were performed using the 2020.11 release of QIIME 2 with the  
129 Sidle and the RESCRIPt plugins.

130

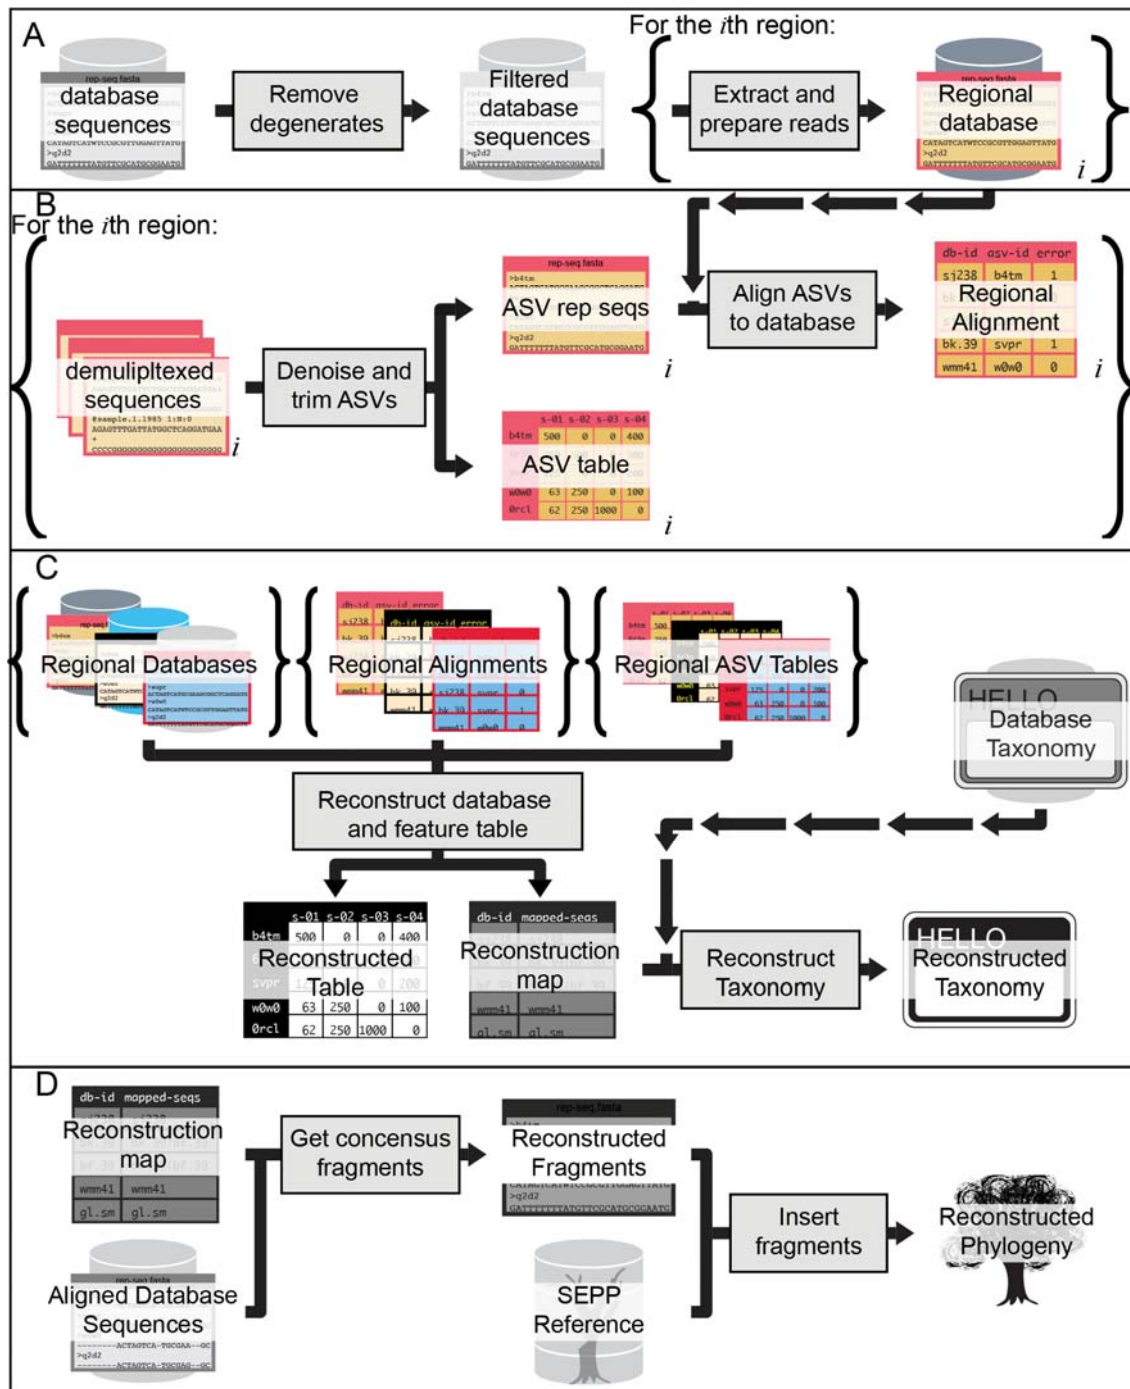

131  
132  
133  
134  
135  
136  
137  
138  
139  
140

**Figure 1. Schematic of Sidle Reconstruction.** (A) The database is filtered to remove undesirable sequences and then per-region database are extracted and prepared. (B) The reads for each region are denoised and aligned with the per-region database. (C) The regional databases, regional alignments, and regional ASV tables are combined to reconstruct the database for full length sequences and the feature table. The database map is used with the taxonomy to reconstruct the taxonomy sequences. (D) Optionally, a phylogenetic tree can be reconstructed using the aligned sequences from the reference database to reconstruct fragments, which are inserted into a reference backbone.

141 Closed Reference OTU Clustering. In constructing OTUs, we assumed that denoising had  
142 already been applied. Sequences were clustered at 99% identity against the respective  
143 reference databases using vsearch (q2-vsearch) [20]. Taxonomic assignments were inherited  
144 from the database; for the Silva 128 database, the phylogenetic tree was also inherited from  
145 the database (Figure S1).

146

147 ASVs. The feature tables, and their corresponding sequence files, from all regions were  
148 merged. Taxonomic classification on the multi region data was performed using a naïve  
149 Bayesian classifier trained on the full 16S gene q2-feature-classifier [21]. The final feature  
150 table was filtered to exclude any feature without at least phylum level resolution. In cases  
151 where the database was unable to classify a taxonomic level, the lowest defined taxonomic  
152 level was inherited. For the simulated data, we constructed a phylogenetic tree using  
153 fragment insertion into the Silva 128 backbone (q2-fragment-insertion) [22].

154

155 Multiple region alignment with Sidle. The sidle reference databases were filtered to exclude  
156 reference sequences with more than 5 degenerate nucleotides or references which belonged to  
157 kingdom Eukaryota. Reference and ASV sequences were trimmed to a consistent length  
158 (Table S1). Alignment was performed on a per-region basis allowing no more than 2  
159 nucleotides difference for reads over 300nt and 1 for reads under 300nt. Feature tables were  
160 reconstructed using the default parameters in QIIME. Taxonomy was reconstructed, treating  
161 missing taxonomic levels as unique designations. For the simulation, the phylogenetic tree  
162 was generated using the Silva 128 reference [22,23].

163

164 *Performance*

165



166 We benchmarked the performance of the original SMURF implementation and Sidle on the  
167 SMURF tutorial data and the vaginal real dataset (Supplemental Methods). We were unable  
168 to run the SMURF code to expand and prepare the database due to a missing function. To  
169 profile vaginal samples, we were required to concatenate the files into a single fastq file for  
170 each sample and arrange them manually into file folders; this was only possible because the  
171 per-region primers had not been trimmed. SMURF was run in MATLAB 2020b (Mathworks,  
172 Natick, MA, USA) and profiled with the *profile* function. Sidle was profiled using  
173 Snakemake (v 5.3) [24].

174

#### 175 *Statistical Analysis of simulated data*

176

177 Diversity analyses were performed using multiple rarefaction. Feature tables were rarefied to  
178 10,000 sequences/sample five times for each rarefaction method.

179

180 Alpha diversity. Alpha diversity was characterized using Faith's Phylogenetic diversity,  
181 Observed ASVs, Shannon diversity, and Pielou's evenness were calculated on each table  
182 [25,26]. The relative effect size for alpha diversity metrics was calculated as the absolute  
183 value of the Cohen's d statistic; the mean and standard deviation reflect the five iterations.  
184 The values were compared against the reference dataset using an ordinary least squares  
185 regression comparing all the iterations for the reconstruction against all reference iterations;  
186 reference variation was compared using pairwise testing. Regression was performed using  
187 statsmodels (v 0.11.1) [27].

188

189 Beta Diversity. The effect of reconstruction method on the overall community structure was  
190 compared using beta diversity. Rarefied tables were used to calculate Bray-Curtis distance on

191 feature level data; Bray-Curtis distance on a table collapsed to genus level; weighted  
192 UniFrac; and unweighted UniFrac distances (q2-diversity) [28–30]. The reconstruction  
193 methods were compared to the reference dataset using Mantel’s test with 999 permutations in  
194 scikit-bio (v. 0.5.5; [www.scikit-bio.org](http://www.scikit-bio.org)) [31]. The correlation presented is the average Mantel  
195 correlation across all pairwise mantel tests. The mantel correlation for reconstruction  
196 methods were compared using a one-sided t-test with unequal variance. The t-test was  
197 calculated in scipy (v 1.5.2) [32].

198

199 Clade Abundance. Taxonomic abundance was compared between organisms using an  
200 ordinary least-squares regression. Since the reference data and assemblies were annotated  
201 using different databases, we first harmonized the taxonomy. To simplify the comparison,  
202 organisms in the reconstructed taxonomy (based on the Silva database) which were labeled as  
203 “ambiguous”, “unidentified” or “uncultured” were treated as the equivalent of the un-  
204 annotated levels in the Greengenes (reference) database. We also treated any level where the  
205 taxonomic classifier could not resolve the organism or where Sidle could not resolve the taxa  
206 as unannotated. Unannotated levels inherited the lowest defined level. Class assignments  
207 were harmonized between the reference and reconstruction database.

208

209 The counts were normalized and filtered to retain features at the specified level that were  
210 present with an average abundance of at least 0.01%. We used linear regression with a zero-  
211 intercept to calculate the correlation between the reference and reconstructed taxonomic  
212 abundance. We evaluated the relationship between the values using a paired t-test with a  
213 Bonferroni corrected p-value. We considered a  $p < 0.05$  with at least 5% deviation to be  
214 significant. Modeling was performed in statsmodels and scipy [27,32]. The ratio between the

215 reconstruction and reference abundance was plotted using seaborn (v. 0.11.0) and matplotlib  
216 (v. 3.2.2) [33,34].

217

218 *Statistical Analysis of Real Data*

219

220 Within-subject stability was calculated using Bray-Curtis distance on the species-level data  
221 for each method. We used a linear mixed effects model using each individual as a random  
222 effect; modeling was performed in statsmodels [27]. We calculated the distance from the  
223 single region sample by filtering the data to retain species present with a relative abundant of  
224 at least 10% in at least one pool (n=11); these features represented at least 89% of the relative  
225 abundance for all 8 pools. In cases where assignments were different (i.e. cases where the  
226 level could not be assigned or resolved), the missing values were treated as 0 counts. A PCoA  
227 projection and corresponding biplot was calculated using q2-diversity; the PCoA was  
228 visualized using q2-Emperor [35].

229

## 230 **Results**

231

232 *A comparison of Sidle and SMURF*

233 We first compared the performance of Sidle and SMURF for database preparation, profiling a  
234 single sample, and profiling multiple samples (Table S2). We first tried to prepare the  
235 Greengenes database using the set of six SMURF primers [6,17]. We were unable to profile  
236 the full SMURF database generation because the SMURF library was missing a necessary  
237 function to expand the degenerate sequences. This also prevents the use of other databases  
238 directly through the SMURF implementation. Even with this function excluded, database  
239 processing with SMURF took an hour and 43 minutes, compared to the 27 minutes required  
240 by Sidle, a three-fold increase (Table S2). SMURF was more efficient at single sample

241 profiling, taking 7:56 compared to Sidle’s 35:46; this was primarily due to differences in the  
242 time spent on denoising and reconstruction. The Sidle implementation “solves” the database  
243 on the fly, determining the correct sequences during reconstruction while SMURF determines  
244 this database structure during the database preparation step.

245

246 We then tried profiling the two functions using a real dataset rather than the provided tutorial  
247 data. We first tried using a curated, environment-specific database with SMURF, however,  
248 due to the missing function, we were unable to prepare this database. We therefore used the  
249 pre-expanded Greengenes database with the two regional primers. It took SMURF 88  
250 minutes to prepare the database, and when we tried to use this database with the samples, the  
251 database mapping was incorrect and data could not be processed. In contrast, it took 15  
252 minutes to prepare the Greengenes database with Sidle, and full reconstruction took less than  
253 30 minutes, for a total run time of 44 minutes for 24 samples.

254

255 Having determined that Sidle was a more runnable implementation, we then explored the  
256 effect of different reconstruction methods on the reconstructed community. We tried three  
257 methods: using closed reference OTU clustering (“OTUs”), ASVs with naïve Bayesian  
258 taxonomic assignment and a fragment insertion tree (“ASVs”) and multiple region  
259 reconstruction (“Sidle”). These were performed starting from the same set of simulated  
260 amplicons.

261

## 262 *Community Structure*

263

264 We found the reconstructed alpha diversity was highly correlated with the reference values  
265 ( $R^2 > 0.85$ , Table 1). All three reconstruction methods over-estimated the phylogenetic

266 diversity, although the over-estimation was greater when fragment insertion was used,  
267 resulting in 2.91 fold over estimation with Sidle and 3.53 fold over-estimation using ASVs  
268 for reconstruction. With non-phylogenetic metrics, Sidle most faithfully reconstructed the  
269 alpha diversity with no over-estimation, within 0.1 fold (Table 1). ASVs consistently over-  
270 estimated the alpha diversity metrics by the largest factor. OTUs fell between, overestimating  
271 compared to the reference and sidle.

272

273 We also explored beta diversity (Table 2). We found a strong correlation between the  
274 reference community and the reconstructed community using all three reconstruction  
275 methods across all four metrics (mantel  $R^2 > 0.90$ ,  $p=0.001$ , 999 permutations). However,  
276 Sidle represented a significant improvement over OTU clustering and ASV reconstruction for  
277 unweighted UniFrac ( $p < 0.002$ ), weighted UniFrac ( $p < 1 \times 10^{-12}$ ), and feature-based Bray-  
278 Curtis distance ( $p < 1 \times 10^{-12}$ ). However, it underperformed on genus-level Bray Curtis  
279 distance, where ASV-based analysis performed best ( $p < 1 \times 10^{-8}$ ).

280

281 *Taxonomy*

282

283 We compared the correlation between the relative abundance of collapsed taxa at the class  
284 level. Database harmonization across the lower taxonomic levels is notoriously difficult, and  
285 we found large differences below class level.

286 **Table 1. The effect of reconstruction method on the observed alpha diversity**

| Reconstruction Method  | Biological effect |        | Change from reference |         |                |
|------------------------|-------------------|--------|-----------------------|---------|----------------|
|                        | mean              | (std)  | mean                  | (std)   | R <sup>2</sup> |
| Phylogenetic Diversity |                   |        |                       |         |                |
| Reference <sup>a</sup> | 3.92              | (0.04) | 1.000                 | (0.002) | 0.995          |
| OTUs                   | 4.13              | (0.07) | 1.309                 | (0.003) | 0.993          |
| ASVs                   | 4.23              | (0.15) | 3.523                 | (0.007) | 0.992          |
| Sidele                 | 4.19              | (0.11) | 2.910                 | (0.009) | 0.992          |
| Observed Features      |                   |        |                       |         |                |
| Reference <sup>a</sup> | 5.03              | (0.05) | 1.000                 | (0.002) | 0.996          |
| OTUs                   | 5.02              | (0.10) | 1.337                 | (0.003) | 0.995          |
| ASVs                   | 4.89              | (0.12) | 1.869                 | (0.006) | 0.995          |
| Sidele                 | 4.84              | (0.11) | 0.998                 | (0.003) | 0.995          |
| Shannon Diversity      |                   |        |                       |         |                |
| Reference <sup>a</sup> | 4.4               | (0.04) | 1.000                 | (0.000) | 0.999          |
| OTUs                   | 4.21              | (0.04) | 1.102                 | (0.000) | 0.997          |
| ASVs                   | 4.41              | (0.05) | 1.188                 | (0.001) | 0.998          |
| Sidele                 | 4.32              | (0.06) | 1.000                 | (0.001) | 0.998          |
| Pielou's Evenness      |                   |        |                       |         |                |
| Reference <sup>a</sup> | 3.59              | (0.07) | 1.000                 | (0.000) | 0.998          |
| OTUs                   | 3.28              | (0.05) | 1.053                 | (0.000) | 0.990          |
| ASVs                   | 3.66              | (0.06) | 1.078                 | (0.000) | 0.995          |
| Sidele                 | 3.52              | (0.02) | 1.001                 | (0.001) | 0.994          |

<sup>a</sup>Reference is compared to itself through multiple rarefaction

287

288

289 **Table 2. The effect of reconstruction method on the observed beta diversity**

| Method                  | Biological effect size |                      |                      | Comparison to reference |                      |                      |
|-------------------------|------------------------|----------------------|----------------------|-------------------------|----------------------|----------------------|
|                         | Mean                   | R <sup>2</sup> (std) | p-value <sup>a</sup> | mean                    | R <sup>2</sup> (std) | p-value <sup>a</sup> |
| Uweighted UniFrac       |                        |                      |                      |                         |                      |                      |
| Reference <sup>b</sup>  | 0.677                  | (0.007)              | 0.001                | 0.984                   | (0.001)              | 0.001                |
| OTUs                    | 0.669                  | (0.011)              | 0.001                | 0.979                   | (0.002)              | 0.001                |
| ASVs                    | 0.618                  | (0.012)              | 0.001                | 0.976                   | (0.002)              | 0.001                |
| Sidle                   | 0.679                  | (0.010)              | 0.001                | 0.980                   | (0.002)              | 0.001                |
| Weighted UniFrac        |                        |                      |                      |                         |                      |                      |
| Reference <sup>b</sup>  | 0.863                  | (0.002)              | 0.001                | 0.999                   | (0.000)              | 0.001                |
| OTUs                    | 0.842                  | (0.001)              | 0.001                | 0.975                   | (0.000)              | 0.001                |
| ASVs                    | 0.826                  | (0.001)              | 0.001                | 0.974                   | (0.000)              | 0.001                |
| Sidle                   | 0.841                  | (0.001)              | 0.001                | 0.978                   | (0.001)              | 0.001                |
| Bray Curtis             |                        |                      |                      |                         |                      |                      |
| Reference <sup>b</sup>  | 0.835                  | (0.001)              | 0.001                | 0.999                   | (0.000)              | 0.001                |
| OTUs                    | 0.826                  | (0.001)              | 0.001                | 0.998                   | (0.000)              | 0.001                |
| ASVs                    | 0.819                  | (0.001)              | 0.001                | 0.998                   | (0.000)              | 0.001                |
| Sidle                   | 0.839                  | (0.002)              | 0.001                | 0.999                   | (0.000)              | 0.001                |
| Genus level Bray Curtis |                        |                      |                      |                         |                      |                      |
| Reference <sup>b</sup>  | 0.862                  | (0.001)              | 0.001                | 0.999                   | (0.000)              | 0.001                |
| OTUs                    | 0.862                  | (0.001)              | 0.001                | 0.995                   | (0.000)              | 0.001                |
| ASVs                    | 0.860                  | (0.000)              | 0.001                | 0.995                   | (0.000)              | 0.001                |
| Sidle                   | 0.863                  | (0.001)              | 0.001                | 0.995                   | (0.000)              | 0.001                |

<sup>a</sup> Permutative p-value with 999 permutations

<sup>b</sup> Reference is compared to itself through multiple rarefaction

290

291

292 We identified a total of 12 classes present with an average relative abundance of at least  
293 0.01% in the reference dataset which could be mapped to the reconstructed data (Figure 2,  
294 Table S2). We found 8 classes where at least one reconstruction method was significantly  
295 different ( $p < 0.05$ ;  $> 5\%$  deviation). This 5% threshold was selected because of  
296 compositionality in the data: to have a relative increase in one class, we must lose relative  
297 abundance somewhere else; by selecting this threshold, we hoped to allow some shifts  
298 associated with compositionality in the data. We found that all three reconstruction methods  
299 consistently underestimated class Clostridia (p. Firmicutes) by between 10% and 8% (OTUs  
300 0.92 [95% CI 0.90, 0.93]; ASVs 0.90 [95% CI 0.89, 0.92], Sidle 0.91 [95% CI 0.89, 0.93]).  
301 We also found an over-estimation of class Mollicutes (p. Tenericutes). However, while OTU  
302 clustering and ASVs over-estimated the relative abundance by 22% [95% CI 19%, 25%] ( $p <$   
303  $0.005$ ) for both methods, Sidle only over-estimated by 8% [95% CI 6%, 11%] ( $p=0.03$ ). We  
304 also found Sidle performed better in reconstruction of classes Erysipelotrichia and  
305 Deltaproteobacteria, which OTU and ASV reconstruction overestimated and in class  
306 Epsilonproteobacteria, which OTU and ASV-based reconstruction significantly  
307 underestimated (Table S2). Overall, ASV-based methods had significant deviation from the  
308 reference in 8 classes, OTU clustering missed in 5 classes, and Sidle underperformed in two  
309 cases.  
310



311

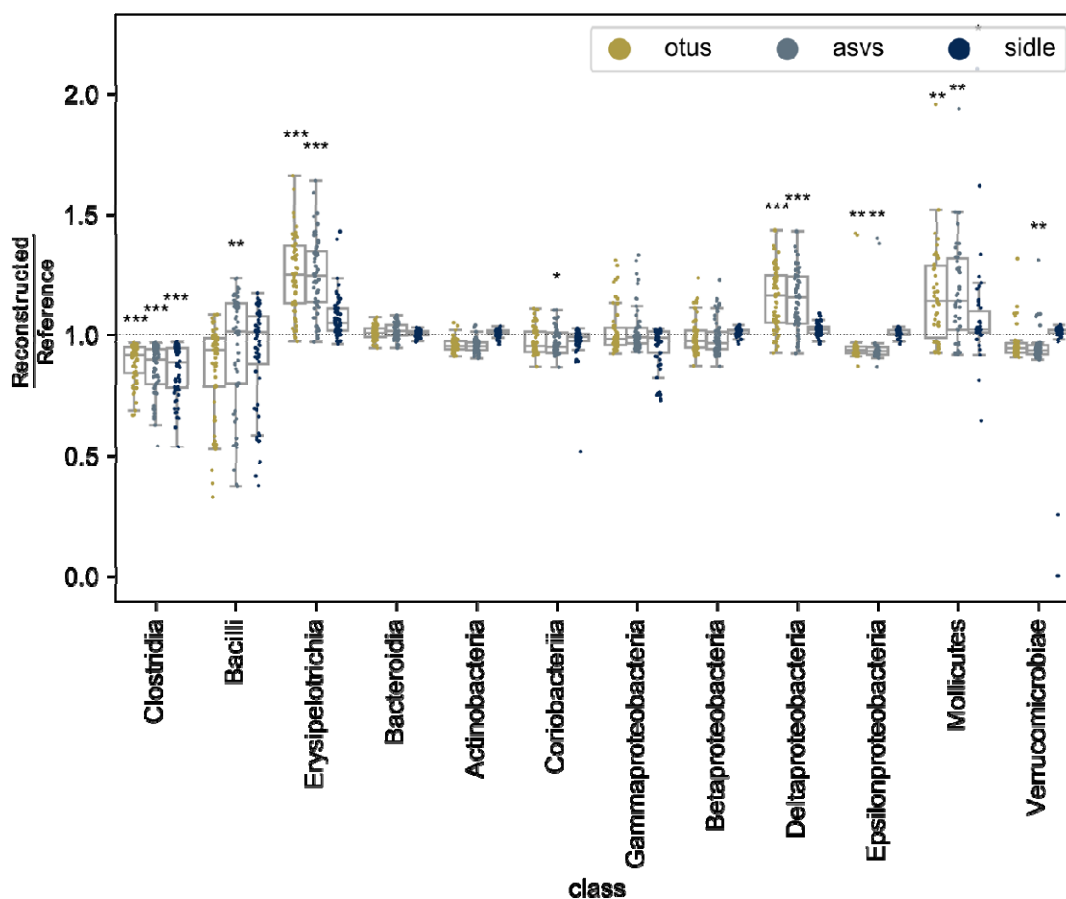

312

313 **Figure 2. Reconstruction method affects the observed relative abundance of bacterial**  
314 **classes.** The ratio of the reconstruction method (OTUs: yellow, ASVs: silver, sidle: dark  
315 blue) shows differences in the reconstruction accuracy. The boxplots with at least a 5%  
316 deviation on average are labeled with FDR-corrected p-value : \*  $p < 0.05$ ; \*\*  $p < 0.01$ ; \*\*\*  $p$   
317  $< 0.001$ . Values below 1 represent under-estimation of a given clade, while those above 1  
318 represent over-estimation of the given clade.

319

320

321 *Applications to real data*

322

323 We also explored the effect of reconstruction on real data using a curated, species-level  
324 database. We first looked at reconstruction using vaginal samples from eight individuals  
325 (Figure 2). We compared a current approach – ASVs drawn from a single region to samples  
326 reconstructed using OTUs, ASVs from both V13 and V34 regions, and Sidle annotated with  
327 Optivag database. Optivag is an environment specific, manually curated database, designed  
328 to allow accurate species level annotation in vaginal communities [19].

329

330 We first evaluated the ability of the ASV-based methods and Sidle to resolve taxonomy. With  
331 ASVs from the V34 region alone, the naïve Bayesian classifier was unable to resolve species  
332 level resolution for a total of 111 ASVs. Classification using the full 16S rRNA gene  
333 sequence with both regions led to 321 ASVs unclassified at species level, including 62 ASVs  
334 of 192 mapped to genus *Lactobacillus*. Sidle was unable to resolve one feature, which led to  
335 one unresolved species: a genus member of *Streptococcus* mapped to either *Streptococcus*  
336 *infantis* or *Streptococcus oralis*.

337

338 We next looked at the taxonomic composition of the individuals using species-level data. We  
339 found the individual vaginal composition was relatively stable, regardless of the method  
340 used. OTUs were significantly more stable than collapsed ASVs from multiple regions  
341 ( $p=0.007$ ); there were not significant differences in stability between any other pairs of  
342 metrics (Figure 3A). We also found the individual to be the strongest determinant of the  
343 community structure. One major concern was the inability of either ASV-based method to  
344 accurately resolve *Lactobacillus* species making it potentially difficult to accurately  
345 distinguish between *Lactobacillus crispatus* and other species (Figure 3B,C).

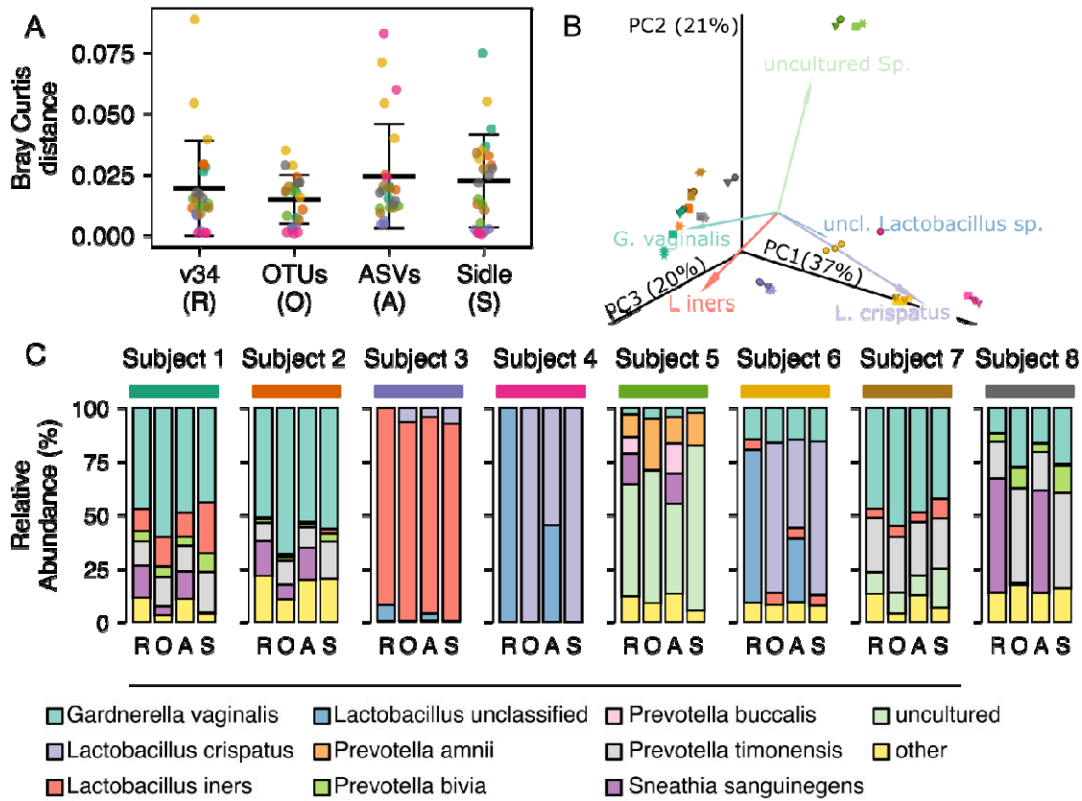

346

347 **Figure 3. The effect of reconstruction method on vaginal communities at species level**  
 348 **resolution.** (A) The within pool species level Bray Curtis distance for reconstruction with the  
 349 V34 region only (R), OTUs (O), ASVs (A), and Sidle (S). Points show intra-subject distance,  
 350 colored by subject. The black bar indicates the global mean, error bars are the standard  
 351 deviation. (B) PCoA biplot of Bray Curtis distance on species level data combined across  
 352 methods. Points are colored by subject (matching A and C), shape indicates the  
 353 reconstruction methods (circle: v34 only, square: OTUs, star: cone: ASVs; star: Sidle). The  
 354 five most abundant clades are shown in the biplot. (C) The average relative abundance per  
 355 subject for each of the four reconstruction methods.  
 356

357 **Discussion**

358

359 In this analysis, we explored three methods for reconstructing multiple fragments of a larger  
360 target gene using a reference database. Our results suggest that the Sidle implementation of  
361 the SMURF algorithm was the best method for reconstructing microbial composition from  
362 multiple 16S rRNA gene regions. In simulation studies, Sidle most accurately calculated non-  
363 phylogenetic alpha diversity, feature-based beta diversity, and led to the lowest bias in clade  
364 relative abundance. Interestingly, we found the tree building method was associated with the  
365 observed phylogenetic diversity. Both ASV reconstruction and Sidle rely on a fragment-  
366 insertion based approach, where the sequences are inserted into a reference backbone [22].  
367 Placements near the tips appear to potentially expand the distance. However, this effect did  
368 not extend to community comparisons. However, although the insertion tree affected the  
369 phylogenetic alpha diversity, it did not affect the UniFrac distance (beta diversity) between  
370 samples, suggesting this may not be a major drawback for such metrics.

371

372 Using real data and an environment-specific curated database, we also found that Sidle  
373 reconstruction provided the most precise species-level annotation. For vaginal communities  
374 like the example community used in this analysis, accurate, species-level *Lactobacillus*  
375 assignments are crucial because closely related species have different effects on community  
376 structure [36]. For example, one study found that vaginal communities containing *L.*  
377 *crispatus* but not *L. inners* was able to inhibit *E. coli* growth [37]. In our data, the classifier  
378 was unable to identify ASVs which were likely *L. crispatus* at the species level, leaving them  
379 annotated as an unclassified member of genus *Lactobacillus*. The inability of ASV-based  
380 annotation to perform species-level resolution therefore has implications for our biological  
381 understanding.

382

383 Sidle had overall superior performance: with only two regions of the 16S rRNA gene, we  
384 were able to resolve the species for all but one feature, which was annotated to genus level. In  
385 contrast, our full-length naïve Bayesian classifier that was used for ASV-based annotation  
386 was unable to assign taxonomy for 111 ASVs, including several members of genus  
387 *Lactobacillus*. It is possible that if we had combined region-specific classifiers, we might  
388 have improved the taxonomic resolution, however, this might also create a bias since  
389 different classifiers would be used on different regions [21]. The evaluation is perhaps  
390 hardest with OTU clustering. Because the OTUs use the taxonomic annotation assigned to  
391 the reference sequence in the database, the observed sequence annotation depends on the  
392 database resolution. However, recent work has suggested that the traditional 97% identity  
393 threshold used for OTU clustering is insufficient for species-level annotation, and short read  
394 amplicons require almost 100% identity OTUs (essentially ASVs) [38]. It has also been  
395 argued that reference based OTU clustering methods can be misleading: the sequences  
396 included in the OTU clusters may have a similarity larger than the threshold identity, as long  
397 as they share the same level of similarity to the reference [39]. The main advantage of OTU  
398 clustering for multiple region scaffolding is that the use of consistent reference allows  
399 multiple regions to be combined, however, the approach comes with all the drawbacks of  
400 single region OTUs-clustering.

401

402 Although Sidle performed the best of our reconstruction methods, there are some drawbacks.  
403 First, although the authors of the SMURF algorithm claim species level resolution, this is  
404 obviously limited by database resolution. With specialized, well curated databases like the  
405 Optivag database or Human Oral Microbiome Database, species level resolution is  
406 achievable and trust-worthy [19,40,41]. However, more general databases like the Silva

407 database may not provide accurate annotation at lower taxonomic levels, especially because  
408 Silva does not curate species assignments [23]. Therefore, the user must consider the  
409 database they plan to use and its resolution. Next, Sidle and OTU clustering are limited by  
410 database coverage. The methods may not be appropriate for environments with poor database  
411 coverage, such as soil or saltwater, since sequences may be discarded. Third, the SMURF  
412 algorithm (and Sidle by extension) requires the exact primers used to amplify the sequences  
413 for database preparation. Databases are re-usable, so companies with proprietary primers  
414 might be able to provide a prepared database. However, this may be a challenge for data re-  
415 use and future publications will need to be careful about including primer pairs and read  
416 lengths used for annotation.

417

418 In conclusion, we present Sidle, an open-source implementation of the SMURF algorithm  
419 with a novel tree building approach. We demonstrated that Sidle was best able to reconstruct  
420 a reference community in reconstruction and provided high quality species level annotation  
421 with a curated database. We hope this library serves as a resource to the community.

422

423 **Author Contributions**

424 JWD wrote the q2-side plugin; LWH and MR reviewed the code. JWD designed the  
425 simulation experiment, performed the simulation, and analyzed the real data. JWD wrote the  
426 manuscript with critical edits from LWH and MR. LE and WY secured funding. All authors  
427 reviewed and approved the final manuscript.

428

429 **Acknowledgements**

430 The authors wish to thank Noam Shental for his permission to re-implement the Matlab  
431 SMURF code in python under a BSD-3 license. Thanks to the QIIME 2 forum community  
432 for fruitful discussions about how to separate and evaluate multiple 16S regions and  
433 invaluable support for plugin development, especially Evan Bolyen, Matthew R Dillion, Carli  
434 Jones, and Chris Keefe. Thanks also to Nele Brussellaers for her helpful discussion and edits.

435

436 **Funding Statements**

437 This work was supported by the Consolidator grant (no.: 682663) from European Research  
438 Council (to W.Y.); a Horizon 2020 grant (no. 825410) from the European Research Council  
439 and the Söderbergs stiftelse.

440

441 **Data Availability**

442 All work is based on published datasets. Simulations are based on Yatsunenko et al. Original  
443 sequences can be downloaded from ENA study PRJEB3079; simulation seed data came from  
444 Qiita study 850, using the 100nt 97% closed reference OTU table (Qiita artifact 45113).  
445 Real data is derived from a benchmarking study by Hugerth et al. Sequences are deposited in  
446 ENA under study PRJEB37382. Data used from comparing the MATLAB SMURF

447 implementation and Sidle performance came from Fuks et al via their tutorial; data was  
448 downloaded from <https://github.com/NoamShental/SMURF>.

449

#### 450 **Code Availability and Implementation**

451 The q2-sidle plugin is available as a pip-installable qiime2 plugin under a BSD 3 license

452 (<https://github.com/jwdebelius/q2-sidle>). For installation instructions and tutorials, see

453 <https://q2-sidle.readthedocs.io/en/latest/>.

454 Analysis code for this paper is available from <https://github.com/jwdebelius/avengers->

455 [assemble](#)

456



457 **References**

- 458 1. Marotz CA, Sanders JG, Zuniga C *et al.* Improving saliva shotgun metagenomics by  
459 chemical host DNA depletion. *Microbiome* 2018;**6**:42.
- 460 2. Cao Y, Fanning S, Proos S *et al.* A Review on the Applications of Next Generation  
461 Sequencing Technologies as Applied to Food-Related Microbiome Studies. *Front Microbiol*  
462 2017;**8**, DOI: 10.3389/fmicb.2017.01829.
- 463 3. Clooney AG, Fouhy F, Sleator RD *et al.* Comparing Apples and Oranges?: Next  
464 Generation Sequencing and Its Impact on Microbiome Analysis. *PLoS One*  
465 2016;**11**:e0148028.
- 466 4. Quail MA, Smith M, Coupland P *et al.* A tale of three next generation sequencing  
467 platforms: comparison of Ion Torrent, Pacific Biosciences and Illumina MiSeq sequencers.  
468 *BMC Genomics* 2012;**13**:341.
- 469 5. Thijs S, Op De Beeck M, Beckers B *et al.* Comparative Evaluation of Four Bacteria-  
470 Specific Primer Pairs for 16S rRNA Gene Surveys. *Front Microbiol* 2017;**8**, DOI:  
471 10.3389/fmicb.2017.00494.
- 472 6. Fuks G, Elgart M, Amir A *et al.* Combining 16S rRNA gene variable regions enables high-  
473 resolution microbial community profiling. *Microbiome* 2018;**6**:17.
- 474 7. Wang Q, Garrity GM, Tiedje JM *et al.* Naïve Bayesian Classifier for Rapid Assignment of  
475 rRNA Sequences into the New Bacterial Taxonomy. *Appl Environ Microbiol* 2007;**73**:5261–  
476 7.
- 477 8. Wasimuddin, Schlaeppi K, Ronchi F *et al.* Evaluation of primer pairs for microbiome  
478 profiling from soils to humans within the One Health framework. *Molecular Ecology*  
479 *Resources* 2020;**20**:1558–71.
- 480 9. Graspeuntner S, Loeper N, Künzel S *et al.* Selection of validated hypervariable regions is  
481 crucial in 16S-based microbiota studies of the female genital tract. *Scientific Reports*  
482 2018;**8**:9678.
- 483 10. Callahan BJ, Grinevich D, Thakur S *et al.* Ultra-accurate Microbial Amplicon  
484 Sequencing Directly from Complex Samples with Synthetic Long Reads. *bioRxiv*  
485 2020:2020.07.07.192286.
- 486 11. Guyard A, Boyez A, Pujals A *et al.* DNA degrades during storage in formalin-fixed and  
487 paraffin-embedded tissue blocks. *Virchows Arch* 2017;**471**:491–500.
- 488 12. Loop Genomics. LoopSeq 16S Long Read Kit Manual v. 2.1. 2020.
- 489 13. Barb JJ, Oler AJ, Kim H-S *et al.* Development of an Analysis Pipeline Characterizing  
490 Multiple Hypervariable Regions of 16S rRNA Using Mock Samples. *PLOS ONE*  
491 2016;**11**:e0148047.
- 492 14. Martiny JBH, Jones SE, Lennon JT *et al.* Microbiomes in light of traits: A phylogenetic  
493 perspective. *Science* 2015;**350**:aac9323.

- 494 15. Bolyen E, Rideout JR, Dillon MR *et al.* Reproducible, interactive, scalable and extensible  
495 microbiome data science using QIIME 2. *Nat Biotechnol* 2019;**37**:852–7.
- 496 16. Rocklin M. Dask: Parallel Computation with Blocked algorithms and Task Scheduling.  
497 In: Huff K, Bergstra J (eds.). *Proceedings of the 14th Python in Science Conference*. 2015,  
498 130–6.
- 499 17. McDonald D, Price MN, Goodrich J *et al.* An improved Greengenes taxonomy with  
500 explicit ranks for ecological and evolutionary analyses of bacteria and archaea. *ISME J*  
501 2012;**6**:610–8.
- 502 18. Quast C, Pruesse E, Yilmaz P *et al.* The SILVA ribosomal RNA gene database project:  
503 improved data processing and web-based tools. *Nucleic Acids Res* 2013;**41**:D590-596.
- 504 19. Hugerth LW, Pereira M, Zha Y *et al.* Assessment of In Vitro and In Silico Protocols for  
505 Sequence-Based Characterization of the Human Vaginal Microbiome. *mSphere* 2020;**5**, DOI:  
506 10.1128/mSphere.00448-20.
- 507 20. Rognes T, Flouri T, Nichols B *et al.* VSEARCH: a versatile open source tool for  
508 metagenomics. *PeerJ* 2016;**4**:e2584.
- 509 21. Bokulich NA, Kaehler BD, Rideout JR *et al.* Optimizing taxonomic classification of  
510 marker-gene amplicon sequences with QIIME 2’s q2-feature-classifier plugin. *Microbiome*  
511 2018;**6**:90.
- 512 22. Janssen S, McDonald D, Gonzalez A *et al.* Phylogenetic Placement of Exact Amplicon  
513 Sequences Improves Associations with Clinical Information. *mSystems* 2018;**3**, DOI:  
514 10.1128/mSystems.00021-18.
- 515 23. Yilmaz P, Parfrey LW, Yarza P *et al.* The SILVA and “All-species Living Tree Project  
516 (LTP)” taxonomic frameworks. *Nucl Acids Res* 2014;**42**:D643–8.
- 517 24. Köster J, Rahmann S. Snakemake—a scalable bioinformatics workflow engine.  
518 *Bioinformatics* 2012;**28**:2520–2.
- 519 25. Faith DP, Baker AM. Phylogenetic diversity (PD) and biodiversity conservation: some  
520 bioinformatics challenges. *Evol Bioinform Online* 2007;**2**:121–8.
- 521 26. Shannon CE. A mathematical theory of communication. *SIGMOBILE Mob Comput*  
522 *Commun Rev* 2001;**5**:3–55.
- 523 27. Seabold S, Perktold J. Statsmodels: Econometric and Statistical Modeling with Python.  
524 *Proceedings of the 9th Python in Science Conference* 2010;**2010**.
- 525 28. Sørensen TJ. *A Method of Establishing Groups of Equal Amplitude in Plant Sociology*  
526 *Based on Similarity of Species Content and Its Application to Analyses of the Vegetation on*  
527 *Danish Commons*. København: I kommission hos E. Munksgaard, 1948.
- 528 29. Lozupone CA, Hamady M, Kelley ST *et al.* Quantitative and qualitative beta diversity  
529 measures lead to different insights into factors that structure microbial communities. *Appl*  
530 *Environ Microbiol* 2007;**73**:1576–85.

- 531 30. Lozupone C, Knight R. UniFrac: a new phylogenetic method for comparing microbial  
532 communities. *Appl Environ Microbiol* 2005;**71**:8228–35.
- 533 31. Mantel N. The detection of disease clustering and a generalized regression approach.  
534 *Cancer Res* 1967;**27**:209–20.
- 535 32. Virtanen P, Gommers R, Oliphant TE *et al.* SciPy 1.0: fundamental algorithms for  
536 scientific computing in Python. *Nature Methods* 2020;**17**:261–72.
- 537 33. Hunter JD. Matplotlib: A 2D Graphics Environment. *Computing in Science Engineering*  
538 2007;**9**:90–5.
- 539 34. Waskom M, team the seaborn development. *Mwaskom/Seaborn*. Zenodo, 2020.
- 540 35. Vázquez-Baeza Y, Pirrung M, Gonzalez A *et al.* EMPeror: a tool for visualizing high-  
541 throughput microbial community data. *GigaScience* 2013;**2**, DOI: 10.1186/2047-217X-2-16.
- 542 36. Petrova MI, Reid G, Vaneechoutte M *et al.* Lactobacillus iners: Friend or Foe? *Trends in*  
543 *Microbiology* 2017;**25**:182–91.
- 544 37. Ghartey JP, Smith BC, Chen Z *et al.* Lactobacillus crispatus Dominant Vaginal  
545 Microbiome Is Associated with Inhibitory Activity of Female Genital Tract Secretions  
546 against Escherichia coli. *PLOS ONE* 2014;**9**:e96659.
- 547 38. Edgar RC. Updating the 97% identity threshold for 16S ribosomal RNA OTUs.  
548 *Bioinformatics* 2018;**34**:2371–5.
- 549 39. Westcott SL, Schloss PD. De novo clustering methods outperform reference-based  
550 methods for assigning 16S rRNA gene sequences to operational taxonomic units. *PeerJ*  
551 2015;**3**:e1487.
- 552 40. Escapa IF, Chen T, Huang Y *et al.* New Insights into Human Nostril Microbiome from  
553 the Expanded Human Oral Microbiome Database (eHOMD): a Resource for the Microbiome  
554 of the Human Aerodigestive Tract. *mSystems* 2018;**3**, DOI: 10.1128/mSystems.00187-18.
- 555 41. F Escapa I, Huang Y, Chen T *et al.* Construction of habitat-specific training sets to  
556 achieve species-level assignment in 16S rRNA gene datasets. *Microbiome* 2020;**8**:65.
- 557
